# Supplementary material for: Hybrid catalysts based on N-heterocyclic carbene anchored on hierarchical zeolites
Source: Royal Society of Chemistry journal article supplement (doi:10.1039/c9ra07516j), 2019-01-01
Supplement: c9ra07516j1.pdf [file c9ra07516j1.pdf]

## SUPPORTING INFORMATION

### Hybrid catalysts based on N-heterocyclic carbene anchored on hierarchical zeolites

Enrica Gianotti<sup>1\*</sup>, Ivana Miletto<sup>1</sup>, Chiara Ivaldi<sup>1</sup>, Geo Paul<sup>1</sup>, Leonardo Marchese<sup>1</sup>, Marta Meazza<sup>2</sup>, Ramon Rios<sup>2</sup> and Robert Raja<sup>2</sup>

<sup>1</sup>Department of Science and Technological Innovation, Università del Piemonte Orientale, V. T. Michel 11, I-15100 Alessandria, Italy.

<sup>2</sup>School of Chemistry, University of Southampton, University Road, Southampton, SO17 1BJ, U.K.

\* Correspondence: [enrica.gianotti@uniupo.it](mailto:enrica.gianotti@uniupo.it)

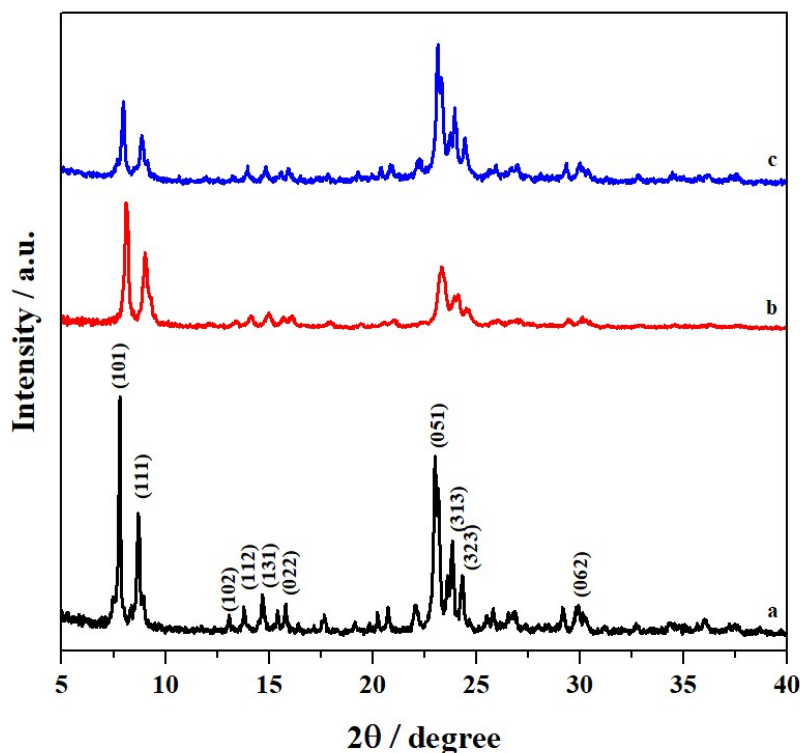

Fig.S1. The XRD pattern of microporous HZSM-5 (a, black), HP HZSM-5 (b, red) and NHC-HP HZSM-5 (c, blue).

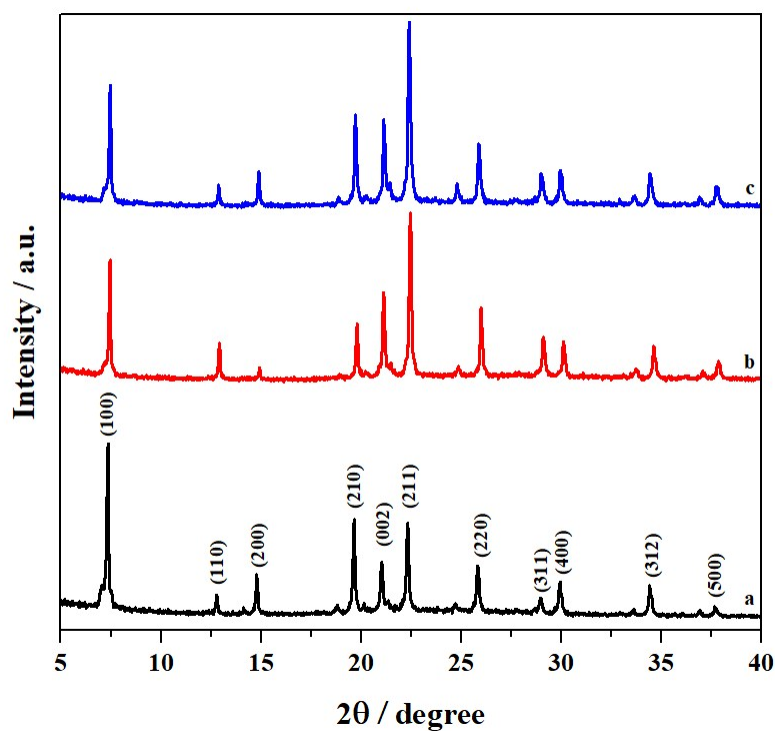

Fig.S2. The XRD patterns of microporous SAPO-5 (a, black), HP SAPO-5 (b, red) and NHC-HP SAPO-5 (c, blue).

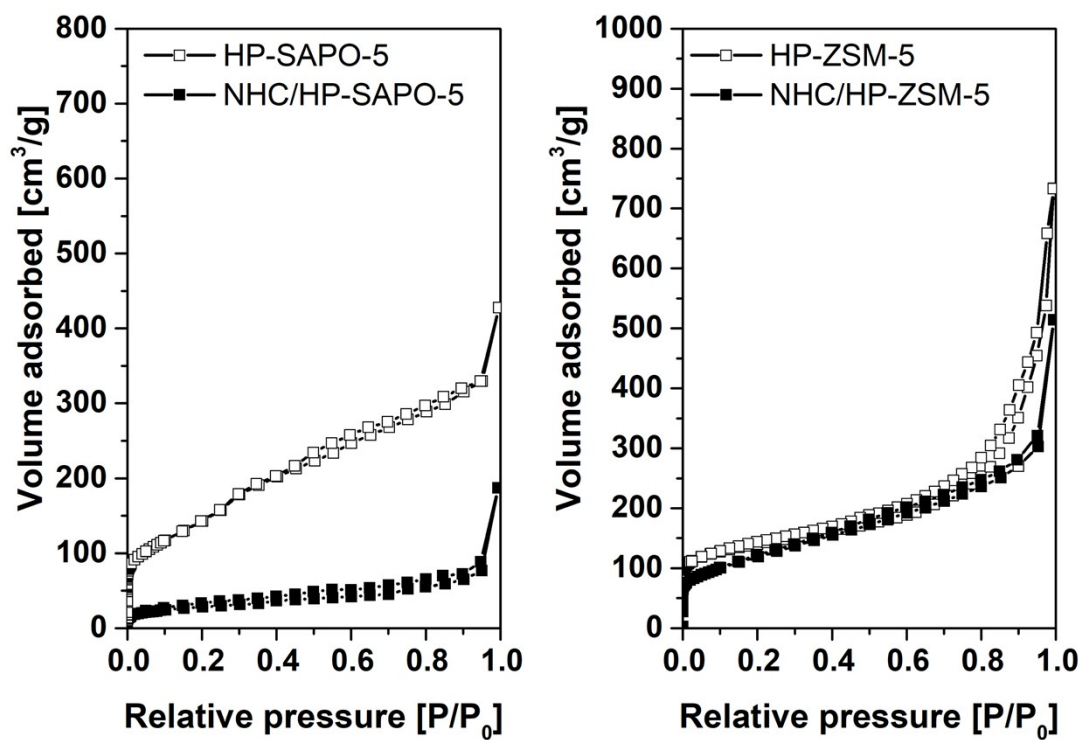

Fig. S3. N<sub>2</sub> adsorption/desorption isotherms at 77 K of HP-SAPO-5, NHC/HP-SAPO-5 HP-HZSM-5 and NHC/HP-HZSM-5.

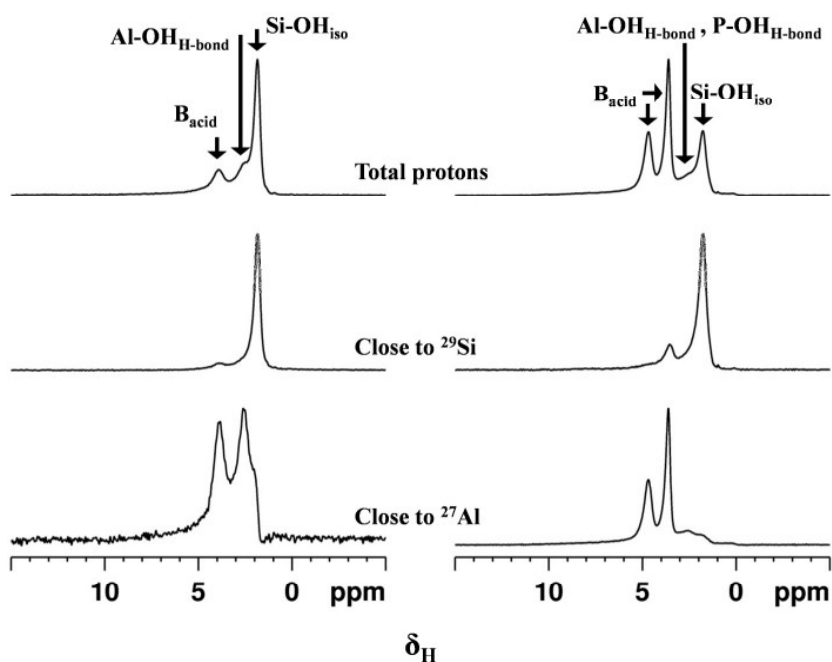

Fig. S4.  $^1\text{H}$  rotor-synchronized spin-echo NMR spectra of calcined HP-HZSM-5 (left panel) and calcined HP-SAPO-5 (right panel) recorded without (top) and with (middle)  $^{27}\text{Al}$  irradiation. A MAS rate of 15 kHz and an echo delay of 2ms were employed during the experiments. The difference spectra (top-middle) is shown at the bottom.

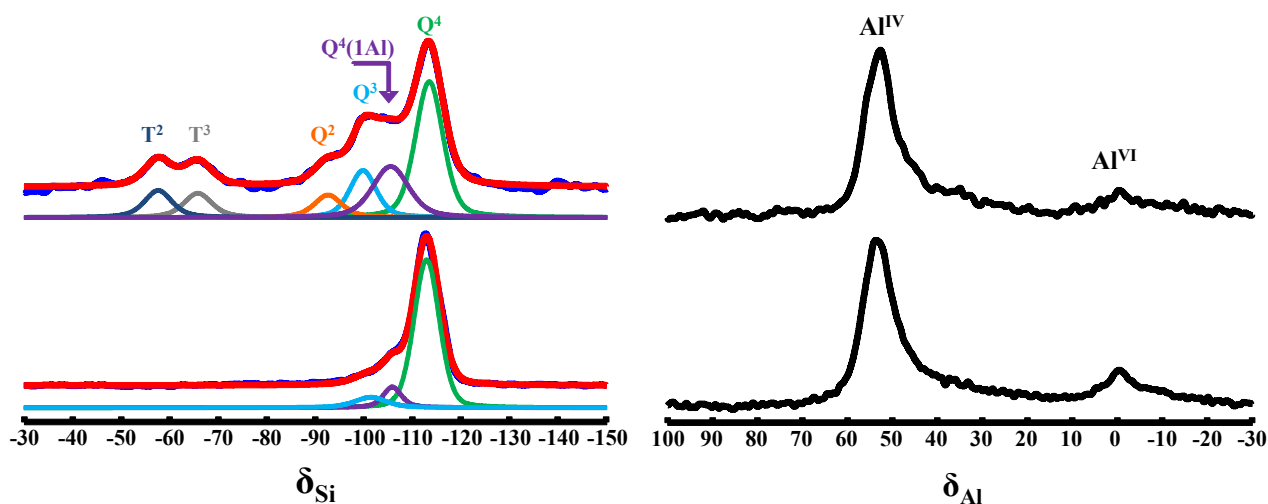

Fig. S5.  $^{29}\text{Si}$  (left panel) and  $^{27}\text{Al}$  (right panel) NMR spectra of NHC/HP-HZSM-5 (top) and HP-HZSM-5 (bottom).  $^{29}\text{Si}$  and  $^{27}\text{Al}$  NMR spectra were recorded using a MAS rate of 10 and 15 kHz, respectively.

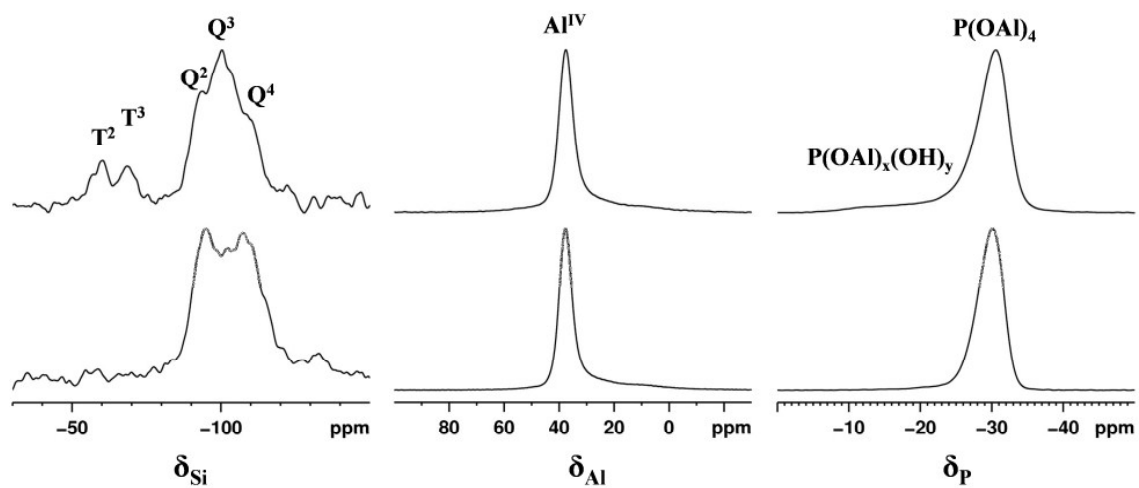

Fig. S6.  $^{29}\text{Si}$  (left panel),  $^{27}\text{Al}$  (middle panel) and  $^{31}\text{P}$  (right panel) NMR spectra of NHC/HP-SAPO-5 (top) and HP-SAPO-5 (bottom).  $^{29}\text{Si}$ ,  $^{27}\text{Al}$  and  $^{31}\text{P}$  NMR spectra were recorded using a MAS rate of 10 and 15 kHz, respectively.
